# Supplementary material
Source: PubMed Central journal article supplement (PMC9435337)
Supplement: jcsm.9986.sm001.pdf [file jcsm.9986.sm001.pdf]

**Table S1**—CVD cause of death codes.

| ICD10 Code | Cause of Death                              |
|------------|---------------------------------------------|
| E785       | Hyperlipidemia                              |
| I219       | Myocardial infarction                       |
| I251       | Atherosclerotic heart disease               |
| I259       | Chronic ischemic heart disease, unspecified |
| I514       | Myocarditis, unspecified                    |

**Table S2**—ICD10/CCI codes for endpoints.

| Outcome                           | ICD10                                                                                                   | Diagnosis Type |
|-----------------------------------|---------------------------------------------------------------------------------------------------------|----------------|
| MI                                | I21, I22                                                                                                | Any            |
| Stroke                            | I60-I64                                                                                                 | Any            |
| Unstable angina                   | I200, I249                                                                                              | Any            |
| VT                                | I472                                                                                                    | Any            |
| Procedures                        | CCI                                                                                                     |                |
| CABG                              | 1IJ76                                                                                                   |                |
| PCI                               | 1IJ50, 1IJ57GQ                                                                                          |                |
| Cardioversion                     | 1HZ09                                                                                                   |                |
| Defibrillation                    | 1HZ53GRFS, 1HZ53HAFS, 1HZ53LAFS, 1HZ53SYFS                                                              |                |
| Pacemaker                         | 1HZ53GRNM, 1HZ53LANM, 1HZ53QANM,<br>1HZ53GRNK, 1HZ53LANK, 1HZ53QANK,<br>1HZ53GRNL, 1HZ53LANL, 1HZ53QANL |                |
| Cardiac resynchronization therapy | 1HZ53GRFS, 1HZ53HAFS, 1HZ53LAFS, 1HZ53SYFS                                                              |                |

Definitions: The events included stroke, myocardial infarction, primary heart failure, acute coronary syndrome, ventricular tachycardia, atrial fibrillation, percutaneous coronary intervention (PCI) and coronary artery bypass graft (CABG). Stroke was defined as nontraumatic subarachnoid hemorrhage (I60), nontraumatic intracerebral hemorrhage (I61), cerebral infarction (I63) stroke not specified as hemorrhage or infarction(I64). Transient ischemic attacks (TIA) were not included in the stroke diagnosis. Myocardial infarction (MI) was defined as acute myocardial infarction including all transmural sites (I21), and subsequent myocardial infarction (I22). Ventricular tachycardia (VT) was defined using code ICD-10-CA I47.2. Acute coronary syndrome included unstable angina (I200), unspecified acute ischemic heart disease (I248, I249), angina pectoris with documented spasm (i201), other angina (I208), unspecified angina pectoris (I209), coronary thrombosis not resulting in myocardial infarction (I240), and Dressler’s syndrome (I241). We only included deaths with underlying cardiovascular causes. Death causes included hyperlipidemia (E 785), myocardial infarction (I219), atherosclerotic heart disease (I251), chronic ischemic heart disease (I259), and myocarditis (I514).

**Table S3**—Type of cardiovascular event by symptom subtype.

|                        | <b>Total<br/>(n = 1607)</b> | <b>Non-OSA<br/>(n = 315)</b> | <b>Minimally<br/>Symptomatic<br/>Subtype<br/>(n = 128)</b> | <b>Disturbed<br/>Sleep<br/>Subtype<br/>without<br/>Excessive<br/>Sleepiness<br/>(n = 457)</b> | <b>Moderate<br/>Sleepiness<br/>with<br/>Disturbed<br/>Sleep<br/>Subtype<br/>(n = 515)</b> | <b>Excessively<br/>Sleepiness<br/>with<br/>Disturbed<br/>Sleep<br/>Subtype<br/>(n = 192)</b> |
|------------------------|-----------------------------|------------------------------|------------------------------------------------------------|-----------------------------------------------------------------------------------------------|-------------------------------------------------------------------------------------------|----------------------------------------------------------------------------------------------|
| Myocardial infarction  | 54                          | 6                            | 5                                                          | 19                                                                                            | 21                                                                                        | 3                                                                                            |
| Stroke                 | 24                          | 1                            | 4                                                          | 5                                                                                             | 9                                                                                         | 5                                                                                            |
| Unstable angina        | 44                          | 7                            | 4                                                          | 15                                                                                            | 13                                                                                        | 5                                                                                            |
| **CABG                 | 26                          | 6                            | 2                                                          | 11                                                                                            | 5                                                                                         | 2                                                                                            |
| ***CRTP                | 1                           | 0                            | 0                                                          | 1                                                                                             | 0                                                                                         | 0                                                                                            |
| Defibrillation         | 6                           | 1                            | 1                                                          | 1                                                                                             | 2                                                                                         | 1                                                                                            |
| ****PCI                | 61                          | 7                            | 5                                                          | 20                                                                                            | 20                                                                                        | 9                                                                                            |
| Death (related to CVD) | 70                          | 6                            | 6                                                          | 23                                                                                            | 27                                                                                        | 8                                                                                            |
| Total events           | 286                         | 34                           | 27                                                         | 95                                                                                            | 97                                                                                        | 33                                                                                           |

\*These numbers are total events and as a result there are multiple events in individuals.

\*\*CABG: coronary artery bypass grafting.

\*\*\*CRTP: cardiac resynchronization therapy with pacemaker.

\*\*\*\*PCI: percutaneous coronary intervention.

**Table S4**—Characteristics according to CPAP adherence group.

|                                 | <b>Not Prescribed<br/>(n = 365)</b> | <b>Non-Adherent<br/>(n = 180)</b> | <b>Adherent<br/>(n = 357)</b> | <b><i>P</i></b> |
|---------------------------------|-------------------------------------|-----------------------------------|-------------------------------|-----------------|
| AHI                             | 8.93 (10.18)                        | 26.84 (21.02)                     | 34.29 (25.04)                 | <.001           |
| Age (years)                     | 47.46 (12.91)                       | 51.53 (11.29)                     | 51.12 (11.08)                 | <.001           |
| BMI                             | 29.74 (6.22)                        | 32.11 (7.68)                      | 33.59 (10.42)                 | <.001           |
| ESS*                            | 8.18 (5.41)                         | 9.30 (5.55)                       | 9.87 (5.77)                   | <.001           |
| Categorical<br>variables, n (%) |                                     |                                   |                               |                 |
| Male sex                        | 221 (62.08%)                        | 119 (68.39%)                      | 248 (72.30%)                  | <.01            |
| Hypertension                    | 46 (12.67%)                         | 24 (13.56%)                       | 83 (23.58%)                   | <.01            |
| Diabetes                        | 25 (6.89%)                          | 16 (9.04%)                        | 49 (13.92%)                   | <.01            |
| Prior heart<br>disease          | 8 (2.20%)                           | 6 (3.39%)                         | 18 (5.11%)                    | 0.11            |
| Current smoker                  | 46 (12.64%)                         | 26 (14.44%)                       | 41 (11.48%)                   | 0.62            |

Continuous variables are presented as means and SD, *P* value from ANOVA, chi-square test comparing variables across subtypes.

\*ESS scores range from 0-24.

**Table S5—CPAP Adherence by symptom subtype.**

|                | <b>Total<br/>(n = 703)</b> | <b>Minimally<br/>Symptomatic<br/>Subtype<br/>(n = 72)</b> | <b>Disturbed<br/>Sleep without<br/>Excessive<br/>Sleepiness<br/>Subtype<br/>(n = 231)</b> | <b>Moderate<br/>Sleepiness<br/>with<br/>Disturbed<br/>Sleep Subtype<br/>(n = 297)</b> | <b>Excessively<br/>Sleepiness with<br/>Disturbed Sleep<br/>Subtype<br/>(n = 103)</b> |
|----------------|----------------------------|-----------------------------------------------------------|-------------------------------------------------------------------------------------------|---------------------------------------------------------------------------------------|--------------------------------------------------------------------------------------|
| Not prescribed | Yes= 194<br>(27.60%)       | Yes= 26<br>(36.11%)                                       | Yes= 77<br>(33.33%)                                                                       | Yes= 72<br>(24.24%)                                                                   | Yes= 19<br>(18.45%)                                                                  |
| Non-adherent   | Yes= 171<br>(24.32%)       | Yes= 16<br>(22.22%)                                       | Yes= 55<br>(23.81%)                                                                       | Yes= 75<br>(25.25%)                                                                   | Yes= 25<br>(24.27%)                                                                  |
| Adherent       | Yes= 338<br>(48.08%)       | Yes= 30<br>(41.67%)                                       | Yes= 99<br>(42.86%)                                                                       | Yes= 150<br>(50.51%)                                                                  | Yes= 59<br>(57.28%)                                                                  |

\* Chi Square  $P = 0.04$

**Table S6**—Cox proportion hazards model with incident cardiovascular/cerebrovascular events as the outcome and CPAP adherence added to the model.

|                                                       | <b>Estimate</b> | <b>Standard Error</b> | <b>P</b> | <b>Hazard Ratio</b> | <b>95% Hazard Ratio CI</b> |
|-------------------------------------------------------|-----------------|-----------------------|----------|---------------------|----------------------------|
| Disturbed sleep without excessive sleepiness subtype* | 0.31            | 0.46                  | 0.51     | 1.36                | (0.55, 3.39)               |
| Moderate sleepiness with disturbed sleep subtype*     | 0.24            | 0.43                  | 0.57     | 1.27                | (0.55, 2.96)               |
| Excessively sleepiness with disturbed sleep subtype*  | 0.36            | 0.49                  | 0.47     | 1.43                | (0.54, 3.77)               |
| Male                                                  | 0.38            | 0.33                  | 0.25     | 1.46                | (0.77, 2.79)               |
| Age                                                   | 0.09            | 0.01                  | <.001    | 1.09                | (1.06, 1.12)               |
| BMI                                                   | 0.03            | 0.02                  | 0.10     | 1.03                | (0.99, 1.07)               |
| AHI                                                   | 0.002           | 0.01                  | 0.70     | 1.00                | (0.99, 1.02)               |
| Hypertension                                          | 0.45            | 0.32                  | 0.16     | 1.58                | (0.84, 2.97)               |
| Diabetes                                              | 0.18            | 0.36                  | 0.61     | 1.20                | (0.59, 2.42)               |
| Prior heart disease                                   | 0.56            | 0.44                  | 0.21     | 1.75                | (0.73, 4.16)               |
| Current smoker                                        | 0.61            | 0.39                  | 0.12     | 1.84                | (0.85, 3.98)               |
| CPAP adherence (non-adherent) **                      | -0.19           | 0.42                  | 0.66     | 0.83                | (0.36, 1.91)               |
| CPAP adherence (adherent) **                          | 0.05            | 0.36                  | 0.89     | 1.05                | (0.52, 2.13)               |

\*Minimally symptomatic as the reference.

\*\*Group of patients not prescribed CPAP as the reference.
